# Supplementary material for: CsSE59 Encoding Invertase/Pectin Methyl Esterase Inhibitor Is a Candidate Gene Conferring the Virescent True Leaf Phenotype in Cucumber
Source: MDPI journal article supplement (doi:10.3390/horticulturae9090951), 2023-08-22
Supplement: s1 [file s1]

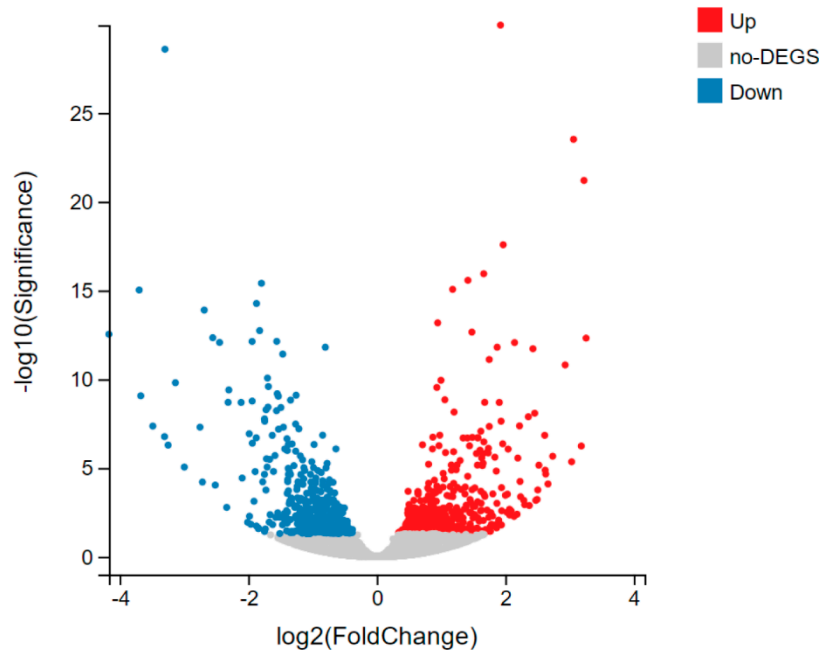

**Figure S1.** Volcanic map of differences between groups of *se59* and WT. The X axis represents the difference multiple value after log2 conversion, and the Y axis represents the significant value after -log10 conversion. Red represents up-regulated DEGs, blue represents down-regulated DEGs, and gray represents non-DEGs.

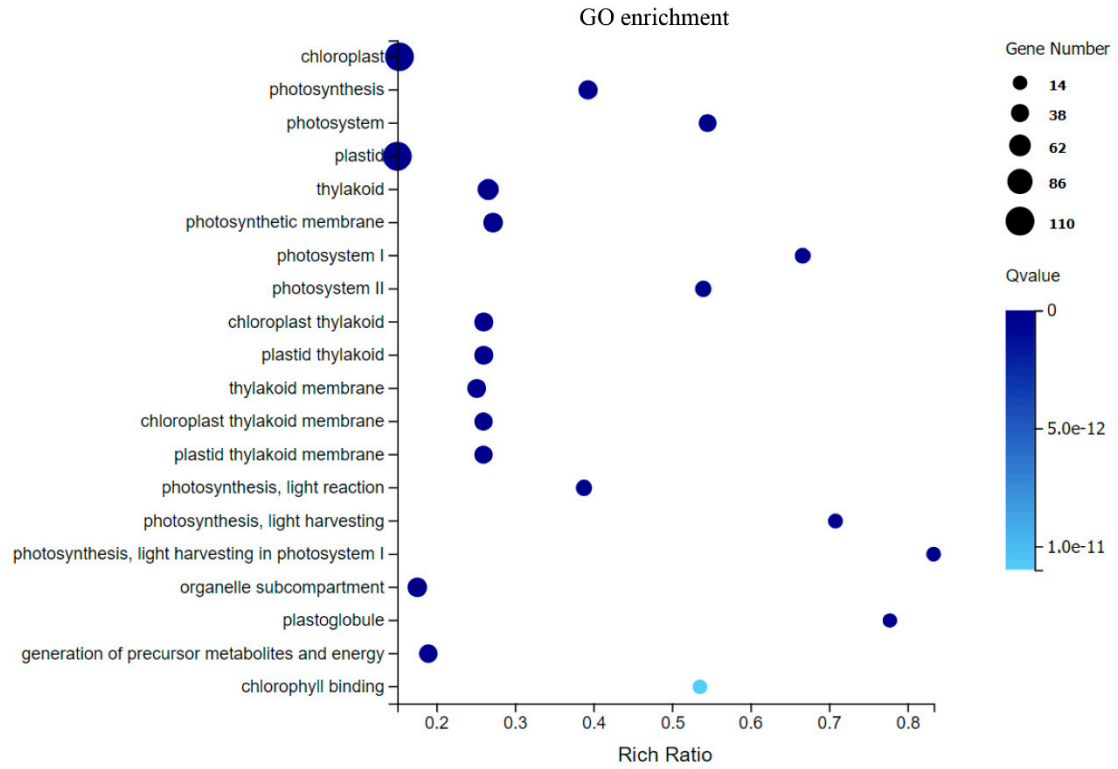

**Figure S2.** The GO enrichment scatter plot of virescent leaf related genes in cucumber.

**Table S1.** Agronomic properties of wild type and mutant *se59* at different growth periods.

| Growth Period   | Material    | Height (cm) | Leaf length (cm) | Leaf Width (cm) | Stem diameter (cm) | Petiole length (cm) | Petal length (cm) | Petal Width (cm) |
|-----------------|-------------|-------------|------------------|-----------------|--------------------|---------------------|-------------------|------------------|
| Cotyledon stage | HB          | 2.3 ± 0.3   | 2.4 ± 0.12       | 1.4 ± 0.06      | 0.2 ± 0.1          | -                   | -                 | -                |
|                 | <i>se59</i> | 3.4 ± 0.1** | 2.4 ± 0.15       | 1.5 ± 0.12      | 0.2 ± 0.01         | -                   | -                 | -                |
| Seedling stage  | HB          | 11.9 ± 3.1  | 11.1 ± 1.4       | 13.4 ± 2.1      | 0.9 ± 0.06         | 7.3 ± 0.3           | -                 | -                |
|                 | <i>se59</i> | 10.7 ± 0.3  | 7.1 ± 0.6**      | 8.7 ± 1.0*      | 0.7 ± 0.1          | 6.5 ± 1.4           | -                 | -                |
| Vine stage      | HB          | 102.3 ± 2.1 | 11.1 ± 0.75      | 13 ± 1.0        | 0.8 ± 0.03         | 5.3 ± 0.6           | 2.3 ± 4.4         | 1.7 ± 0.2        |
|                 | <i>se59</i> | 64.3 ± 2.1* | 8.5 ± 0.8*       | 10.5 ± 0.9*     | 0.6 ± 0.1*         | 3.6 ± 0.7*          | 2.2 ± 0.1         | 1.4 ± 0.1        |

Note: \*: significant difference at  $P < 0.05$  by *t*-test.

**Table S2.** The separation ratio of normal leaf color and virescent leaf traits of BC<sub>1</sub> and F<sub>2</sub> generations.

| Offspring       | Material                        | Virescent plant | green leaf plant | Total number | Actual ratio | Expected ratio | $\chi^2$ value | p    |
|-----------------|---------------------------------|-----------------|------------------|--------------|--------------|----------------|----------------|------|
| BC <sub>1</sub> | F <sub>1</sub> ♀× <i>se59</i> ♂ | 76              | 80               | 156          | 1:1.1        | 1:1            | 0.1            | 0.75 |
| F <sub>2</sub>  | <i>se59</i> ♀×HB♂               | 46              | 143              | 189          | 1:3.1        | 1:3            | 0.044          | 0.83 |

( $\chi^2_{0.05, 1} = 3.84$ )

**Table S3.** Candidate differentially expressed genes related to leaf color.

| Gene ID               | Gene description                                            | FPKM<br>( <i>se59</i> ) | FPKM<br>(HB) | Express<br>trends |
|-----------------------|-------------------------------------------------------------|-------------------------|--------------|-------------------|
| <i>CsaV3_2G009680</i> | Photosystem I reaction<br>center subunit XI                 | 1844.71                 | 3143.97      | -1299.26          |
| <i>CsaV3_2G010090</i> | Photosystem I reaction<br>center subunit IV                 | 994.54                  | 1761.63      | -767.09           |
| <i>CsaV3_4G033870</i> | NADPH-protochlorophyllide<br>oxidoreductase                 | 465.56                  | 895.97       | -430.41           |
| <i>CsaV3_3G005070</i> | Reactive intermediate/imine<br>deaminase                    | 77.84                   | 230.85       | -153.01           |
| <i>CsaV3_1G032510</i> | Chlorophyll a-b binding<br>protein                          | 42.89                   | 85.42        | -42.53            |
| <i>CsaV3_3G031580</i> | Chlorophyll a-b binding<br>protein                          | 20.4                    | 54.63        | -34.23            |
| <i>CsaV3_6G001010</i> | GDSL esterase/<br>lipaseGDSL                                | 12.8                    | 20.41        | -7.61             |
| <i>CsaV3_1G011510</i> | Protein<br>DETOXIFICATION                                   | 1.66                    | 4.33         | -2.67             |
| <i>CsaV3_6G002540</i> | pentatricopeptide<br>repeat-containing protein<br>At4g01400 | 10.6                    | 10.63        | -0.03             |
| <i>CsaV3_4G037030</i> | Alpha-amylase                                               | 1.39                    | 1.24         | 0.15              |
| <i>CsaV3_3G016180</i> | pentatricopeptide<br>repeat-containing protein<br>At5g62370 | 4.36                    | 3.62         | 0.74              |
| <i>CsaV3_6G002600</i> | protein SET DOMAIN<br>GROUP 41 isoform X1                   | 7.96                    | 6.5          | 1.46              |
| <i>CsaV3_3G016210</i> | INVs/PMEIs                                                  | 21.58                   | 14.72        | 6.86              |

---

|                       |                                              |        |       |        |
|-----------------------|----------------------------------------------|--------|-------|--------|
| <i>CsaV3_4G034720</i> | Isoaspartyl<br>peptidase/L-asparaginase      | 49.35  | 37.71 | 11.64  |
| <i>CsaV3_6G004820</i> | HSP20-like chaperones<br>superfamily protein | 25.2   | 3.08  | 22.12  |
| <i>CsaV3_3G015240</i> | Calmodulin                                   | 43.64  | 21.15 | 22.49  |
| <i>CsaV3_3G012890</i> | Early light-induced<br>protein               | 235.89 | 40.42 | 195.47 |

---

**Table S4.** Primers used in qRT-PCR.

| Number | Gene ID               | Primer sequence (5'-3')                                      |
|--------|-----------------------|--------------------------------------------------------------|
| 0      | <i>CsaAct3</i>        | F: GAATCCAGCACGATACCA<br>R: TCAACCCAAAGGCTAACA               |
| 1      | <i>CsaV3_3G016180</i> | F: TAAGAAGTTCTATTTGACGATGA<br>R: TGGAATACAATACAACATTAGGT     |
| 2      | <i>CsaV3_3G016210</i> | F: GGATGATGACTGTTTATATGG<br>R: TTAATTGGAGAATTAGTTGGA         |
| 3      | <i>CsaV3_4G034720</i> | F: ATGCGTGGTGGTGGATAGCGAAG<br>R: CCCGAGCCAATGTTCTCTTATG      |
| 4      | <i>CsaV3_6G002540</i> | F: TTACCCACATTTCTCTGTTCATTC<br>R: TCTCTTCTTACATCTTTCTTCAA    |
| 5      | <i>CsaV3_6G002600</i> | F: ATTTAGTGGCTTTGAGTTCCGAA<br>R: CCAGCAACAACCCAACAATTTGC     |
| 6      | <i>CsaV3_1G032510</i> | F: TTCTCAGATTTTCAGCGAAGGTGGA<br>R: CAGGAACAAAGTTGGTAGCGTAAGC |
| 7      | <i>CsaV3_3G031580</i> | F: GCTTGGGGCTCTAGGATGTGTATTC<br>R: TTGACAGGATCAGCAAGATGGTCTG |
| 8      | <i>CsaV3_4G033870</i> | F: AGAGGACTCGCTGGAGGACTAAACG<br>R: TCTCACTCAACTCCCACACTTTCCG |
| 9      | <i>CsaV3_3G012890</i> | F: ATCCCACCGTCACCTCCCAAACCAG<br>R: AAGGCCAAGGCAACAAGGCCCAACA |
| 10     | <i>CsaV3_3G015240</i> | F: ATCCCACCGTCACCTCCCAAACCAG<br>R: AAGGCCAAGGCAACAAGGCCCAACA |
| 11     | <i>CsaV3_6G004820</i> | F: TTTGCTTTTCTGCCGTTAGTGGAAC<br>R: CACCCTCATCGTCGATGTCATTGTC |
| 12     | <i>CsaV3_3G005070</i> | F: CCATCACTCCCTCTGCCAGCACC<br>R: ATCACTCTATCATAATCAGCCCC     |
| 13     | <i>CsaV3_1G011510</i> | F: CTTCTTGCTCTCACCATTCTCCT<br>R: TAATTTCTGTTTGTTCATCCAC      |
| 14     | <i>CsaV3_6G001010</i> | F: AAGAAAGAGCTGGAGCGAGCAAGA<br>R: AGGAAAAGGGAGGGTCAGAATAAG   |
| 15     | <i>CsaV3_2G009680</i> | F: GACGCATCCCTACAAGAACACACT<br>R: GGAGATACCACCGAAGAAAAACCC   |
| 16     | <i>CsaV3_2G010090</i> | F: ATTCTTCATTCATCAGTTATTTG<br>R: TAGGGGCAGGCTTAGGCTTGGGC     |
| 17     | <i>CsaV3_4G037030</i> | F: CTCACGCACCCAGGGATACCAAC<br>R: CTGCCCACTGCATATCTCCAGC      |
